# Supplementary material
Source: Springer Nature journal article supplement (https://www.springermedizin.de/resource/supplementary/12913_2013_2807_MOESM5_ESM.pdf/9531506)

**a: Duration of stable VE: 0 years**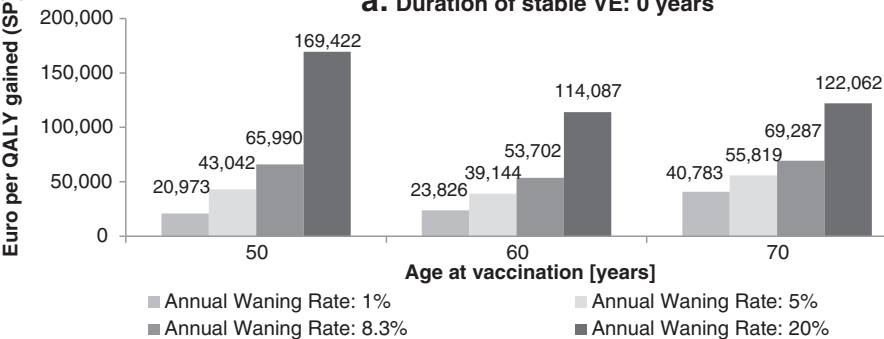**b: Duration of stable VE: 5 years**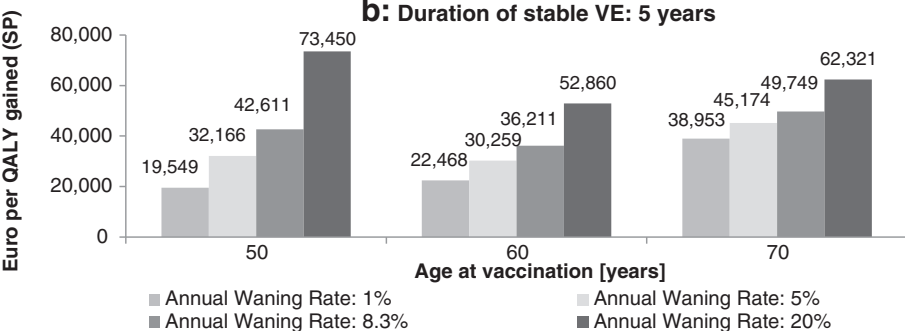**c: Duration of stable VE: 10 years**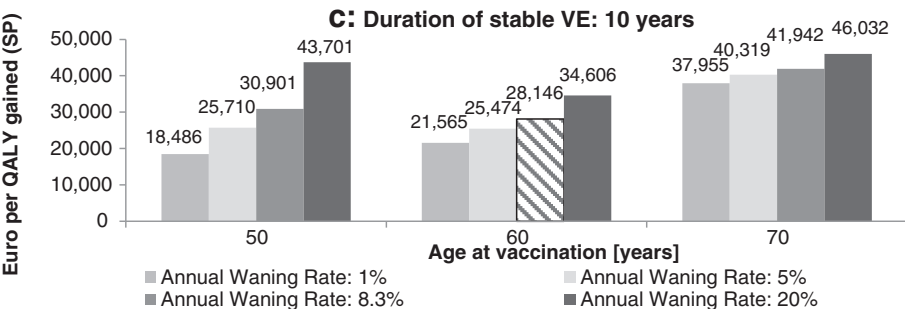**d: Duration of stable VE: 15 years**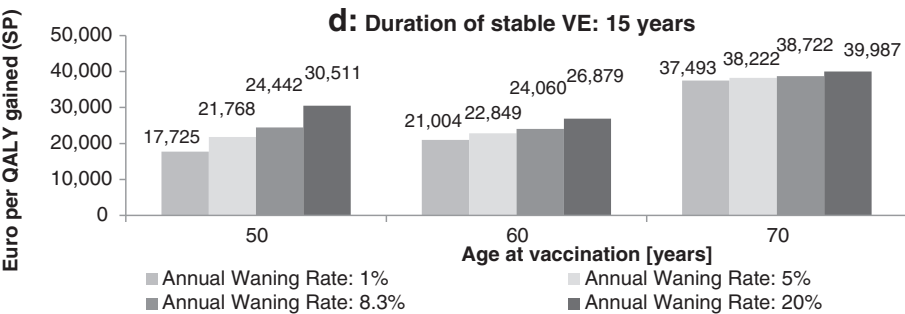

Supplement: MOESM5 [file 9531506]
